# Supplementary material for: Health-Related Quality of Life Impairment and Indirect Cost of Crohn’s Disease: A Self-Report Study in Poland
Source: PubMed Central journal article supplement (PMC5161376; doi:10.1371/journal.pone.0168586), 2016-12-16

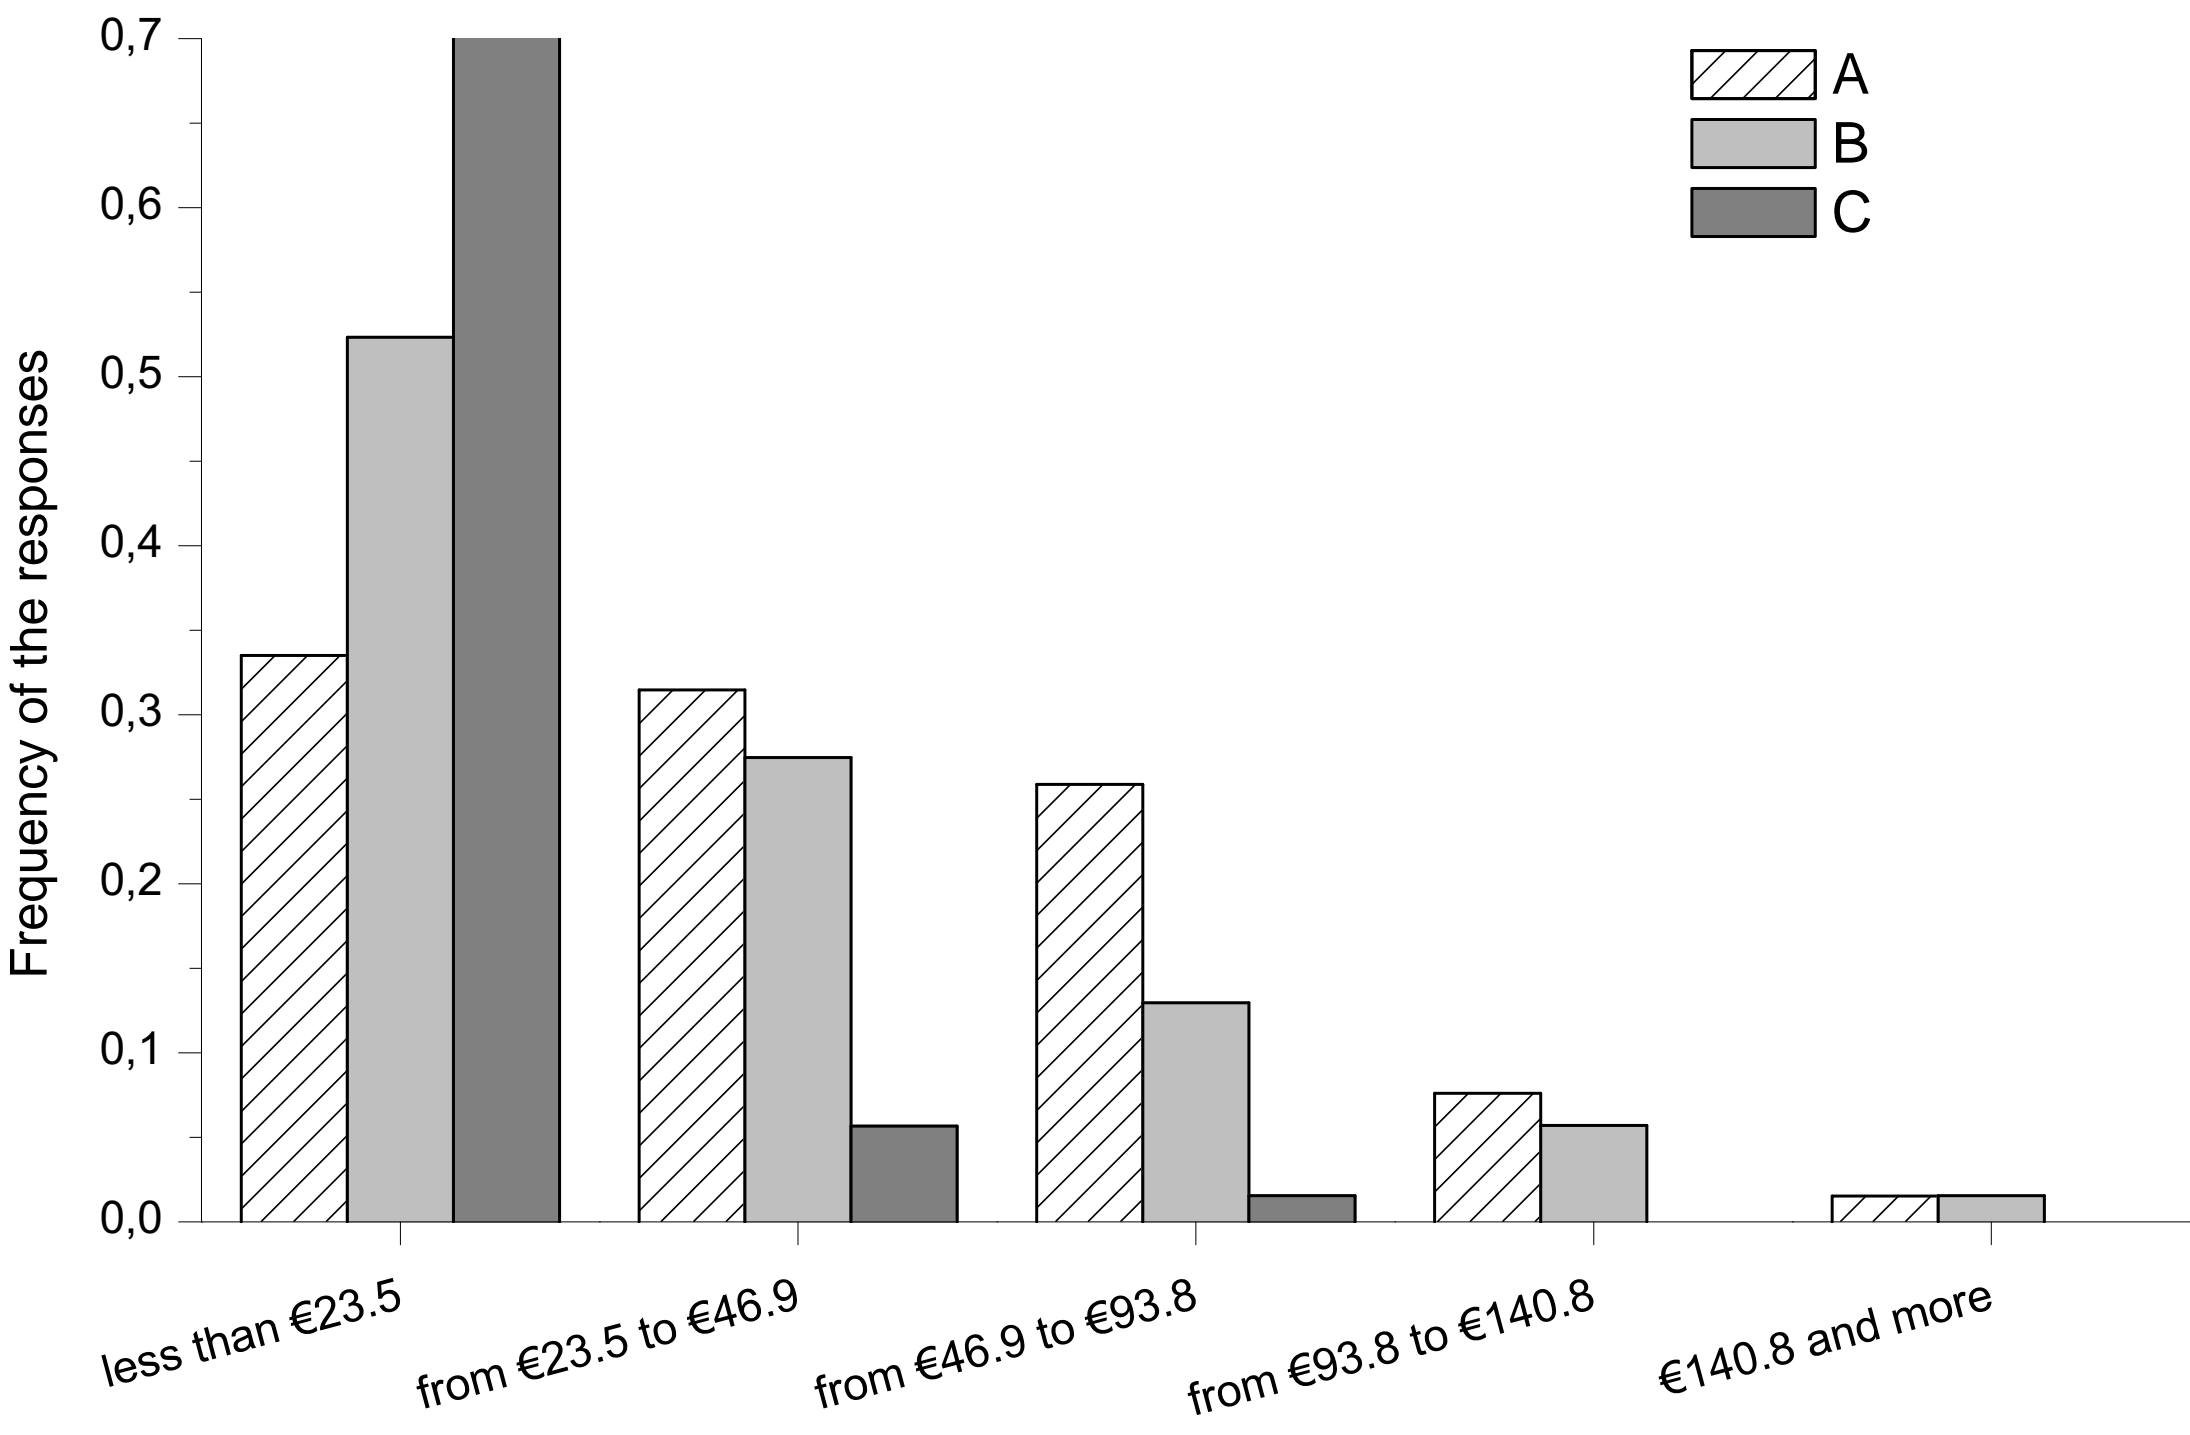

Supplement: pone.0168586.s003.pdf [file pone.0168586.s003.pdf]
