# Supplementary material for: Health-Related Quality of Life Impairment and Indirect Cost of Crohn’s Disease: A Self-Report Study in Poland
Source: PubMed Central journal article supplement (PMC5161376; doi:10.1371/journal.pone.0168586), 2016-12-16
Supplement: pone.0168586.s004.pdf [file pone.0168586.s004.pdf]

**Supplemental Information 2.** Additional characteristics of study participants by disease activity.

| Characteristic                                 | Subcategory                                                | Remission (N=93) | Active disease (N=105) | All patients (N=200) | P value between subgroups |
|------------------------------------------------|------------------------------------------------------------|------------------|------------------------|----------------------|---------------------------|
| Age, mean (SD)                                 |                                                            | 30.60 (9.94)     | 32.86 (10.75)          | 31.80 (10.41)        | 0.087                     |
| Male gender, n (%)                             |                                                            | 40 (43.0)        | 44 (41.9)              | 84 (42.2)            | 0.875                     |
| Age at diagnosis, mean (SD)                    |                                                            | 24.14 (10.26)    | 24.73 (10.88)          | 24.46 (10.57)        | 0.548                     |
| Place of residence, n (%)                      | City with a population of $\geq$ 100 thousands             | 56 (60.2)        | 52 (50.0)              | 110 (55.3)           | 0.227                     |
|                                                | City with a population of <100 thousands                   | 19 (20.4)        | 32 (30.8)              | 51 (25.6)            |                           |
|                                                | Village                                                    | 18 (19.4)        | 20 (19.2)              | 38 (19.1)            |                           |
| Comorbidities                                  | Any, n (%)                                                 | 35 (37.6)        | 50 (47.6)              | 87 (43.5)            | 0.157                     |
|                                                | Number of comorbidities <sup>a</sup> , median (IQR)        | 1 (1 to 2)       | 1 (1 to 2)             | 1 (1 to 2)           | 0.666                     |
| Comorbidities with >5% prevalence <sup>a</sup> | Allergies, n (%) <sup>a</sup>                              | 5 (14.3)         | 7 (14.0)               | 12 (13.8%)           | 0.970                     |
|                                                | Psoriasis, n (%) <sup>a</sup>                              | 3 (8.6)          | 7 (14.0)               | 11 (12.6)            | 0.445                     |
|                                                | Asthma, n (%) <sup>a</sup>                                 | 4 (11.4)         | 5 (10.0)               | 9 (10.3)             | 0.833                     |
|                                                | Hashimoto's thyroiditis, n (%) <sup>a</sup>                | 2 (5.7)          | 5 (10.0)               | 7 (8.0)              | 0.479                     |
|                                                | Celiac disease, n (%) <sup>a</sup>                         | 2 (5.7)          | 3 (6.0)                | 5 (5.7)              | 0.956                     |
| Penetrating disease course                     | Absent, n (%)                                              | 66 (70.97)       | 60 (58.82)             | 126 (63.96)          | 0.127                     |
|                                                | Present, n (%)                                             | 19 (20.43)       | 34 (33.33)             | 54 (27.41)           |                           |
|                                                | 'don't know'/ 'don't remember', n (%)                      | 8 (8.60)         | 8 (7.84)               | 17 (8.63)            |                           |
| Current treatment, n (%)                       | Mesalazine or sulfasalazine                                | 75 (80.6)        | 90 (85.7)              | 166 (83.0)           | 0.339                     |
|                                                | Azathioprine, mercaptopurine or methotrexate               | 52 (55.9)        | 50 (47.6)              | 104 (52.0)           | 0.244                     |
|                                                | Budesonide, prednisone, prednisolone or methylprednisolone | 13 (14.0)        | 37 (35.2)              | 51 (25.5)            | <b>0.001</b>              |
|                                                | Infliximab or adalimumab                                   | 10 (10.8)        | 18 (17.1)              | 28 (14.0)            | 0.198                     |

| Characteristic                                                          | Subcategory                                           | Remission (N=93) | Active disease (N=105) | All patients (N=200) | P value between subgroups |
|-------------------------------------------------------------------------|-------------------------------------------------------|------------------|------------------------|----------------------|---------------------------|
| Surgical treatment in the past                                          | Any, n (%)                                            | 38 (40.9)        | 53 (51.5)              | 92 (46.5)            | 0.138                     |
|                                                                         | Number of surgeries <sup>a</sup> , median (IQR)       | 2 (1 to 3)       | 2 (1 to 3)             | 2 (1 to 3)           | 0.969                     |
|                                                                         | Months since last surgery <sup>a</sup> , median (IQR) | 33 (12 to 70)    | 27 (10.5 to 55)        | 30 (12 to 60)        | 0.781                     |
| Disease activity at last clinical assessment, as indicated by responder | Remission or mild disease, n (%)                      | 84 (90.3)        | 57 (54.3)              | 141 (70.5)           | <b>&lt;0.001</b>          |
|                                                                         | Moderate or severe disease, n (%)                     | 6 (6.5)          | 44 (41.9)              | 52 (26.0)            |                           |
|                                                                         | 'don't know'/ 'don't remember', n (%)                 | 3 (3.2)          | 4 (3.8)                | 7 (3.5)              |                           |
| Current disease activity                                                | P-HBI, mean score (SD)                                | 1.88 (1.37)      | 9.20 (3.98)            | 5.76 (4.76)          | not applicable            |
|                                                                         | Remission or mild disease, n (%)                      | 93 (100)         | 41 (39.0)              | 134 (67.7)           | not applicable            |
|                                                                         | Moderate disease, n (%)                               | n/a              | 58 (55.2)              | 58 (29,3)            |                           |
|                                                                         | Severe disease, n (%)                                 | n/a              | 6 (5.7)                | 6 (3.0)              |                           |
| Current work status                                                     | Any occupational activity, n (%)                      | 60 (64.5)        | 58 (55.2)              | 120 (60.0)           | 0.184                     |
|                                                                         | Full-time, n (%) <sup>a</sup>                         | 51 (85.0)        | 47 (85.5)              | 99 (84.6)            | 0.982                     |
|                                                                         | Part-time, n (%) <sup>a</sup>                         | 3 (5.0)          | 3 (5.5)                | 6 (5.1)              |                           |
|                                                                         | Retired, n (%)                                        | 2 (2.2)          | 2 (1.9)                | 4 (2.0)              | 0.902                     |
|                                                                         | On a social or disability pension, n (%)              | 4 (4.3)          | 16 (15.2)              | 21 (10.5)            | <b>0.011</b>              |
|                                                                         | Student, n (%)                                        | 21 (22.6)        | 21 (20.0)              | 42 (21.0)            | 0.658                     |

<sup>a</sup> among participants with higher-level category characteristic
